# Supplementary material for: The association between neutrophil-to-lymphocyte ratio and all-cause and cardiovascular specific mortality in patients with diabetes and prediabetes complicated by cardiometabolic syndrome
Source: Research Square preprint supplement (doi:10.21203/rs.3.rs-7008763/v1), 2025-07-31
Supplement: Supplementary file 1 [file bd3c55e6a83f6160a47887cf.docx]

**Supplementary files**

**The association between neutrophil-to-lymphocyte ratio and all-cause and cardiovascular specific mortality in patients with diabetes and prediabetes complicated by cardiometabolic syndrome**

**Author Names:** Xiangdong Meng PhD1†, Mingming Fu PhD2†, Chao Fu PhD3, Xiangdong Meng PhD1*

**Author Affiliations:** 1. The Second Clinical Medical College of North Sichuan Medical College, Nanchong, 637000, Sichuan Province, China.

2. North Sichuan Medical College, Nanchong, 637000, Sichuan Province, China.

3. Department of Cardiology, The Second Affiliated Hospital of Harbin Medical University, The Key Laboratory of Myocardial Ischemia, Chinese Ministry of Education, Harbin, Heilongjiang Province, China.

†Xiangdong Meng and Mingming Fu contributed equally to this work.

**Correspondence and Reprint Addressed to:** * The Second Clinical Medical College of North Sichuan Medical College, Nanchong, 637000, Sichuan Province, China. E-mail: jxdx112@163.com.

**Table S1 Subgroup analysis of the associations between NLR and all‑cause mortality**

| Variables | n (%) | HR (95%CI) | *P* | *P* for interaction |
| --- | --- | --- | --- | --- |
|
| Gender |  |  |  | 0.071 |
| Female | 2522 (52.18) | 1.16 (1.10 ~ 1.22) | **<0.001** |  |
| Male | 2311 (47.82) | 1.11 (1.07 ~ 1.15) | **<0.001** |  |
| Race |  |  |  | 0.038 |
| Mexican | 876 (18.13) | 1.20 (1.11 ~ 1.28) | **<0.001** |  |
| Non-Hispanic Black | 1169 (24.19) | 1.15 (1.01 ~ 1.30) | **0.029** |  |
| Non-Hispanic White | 1972 (40.80) | 1.10 (1.07 ~ 1.14) | **<0.001** |  |
| Other | 816 (16.88) | 1.31 (1.11 ~ 1.54) | **0.002** |  |
| Education |  |  |  | 0.752 |
| Below high school | 1548 (32.03) | 1.11 (1.03 ~ 1.20) | **0.005** |  |
| High School or above | 3285 (67.97) | 1.12 (1.09 ~ 1.15) | **<0.001** |  |
| Marital |  |  |  | 0.159 |
| No | 1904 (39.40) | 1.13 (1.09 ~ 1.17) | **<0.001** |  |
| Yes | 2929 (60.60) | 1.10 (1.05 ~ 1.15) | **<0.001** |  |
| Drinking |  |  |  | 0.156 |
| No | 2170 (44.90) | 1.16 (1.11 ~ 1.22) | **<0.001** |  |
| Yes | 2663 (55.10) | 1.11 (1.07 ~ 1.14) | **<0.001** |  |
| Smoking Status |  |  |  | 0.187 |
| Current Smoker | 853 (17.65) | 1.06 (0.99 ~ 1.14) | 0.074 |  |
| Former Smoker | 1611 (33.33) | 1.11 (1.07 ~ 1.15) | **<0.001** |  |
| Never Smoker | 2369 (49.02) | 1.18 (1.10 ~ 1.26) | **<0.001** |  |
| Poverty |  |  |  | <0.001 |
| No | 3286 (67.99) | 1.11 (1.07 ~ 1.15) | **<0.001** |  |
| Yes | 1547 (32.01) | 1.24 (1.15 ~ 1.33) | **<0.001** |  |
| BMI |  |  |  | 0.587 |
| < 25 | 502 (10.39) | 1.12 (1.02 ~ 1.23) | **0.019** |  |
| 25–30 | 1499 (31.02) | 1.12 (1.09 ~ 1.16) | **<0.001** |  |
| ≥ 30 | 2832 (58.60) | 1.15 (1.07 ~ 1.24) | **<0.001** |  |

Abbreviation: BMI: Body Mass Index; NLR: Neutrophil-to-Lymphocyte Ratio; HR: Hazard ratios.

**Table S2 Subgroup analysis of the associations between NLR and cardiovascular specific mortality**

| Variables | n (%) | HR (95%CI) | *P* | P for interaction |
| --- | --- | --- | --- | --- |
|
| Gender |  |  |  | 0.137 |
| Female | 2522 (52.18) | 1.19 (1.10 ~ 1.29) | **<0.001** |  |
| Male | 2311 (47.82) | 1.12 (1.06 ~ 1.18) | **<0.001** |  |
| Race |  |  |  | 0.167 |
| Mexican | 876 (18.13) | 1.22 (1.06 ~ 1.41) | **0.005** |  |
| Non-Hispanic Black | 1169 (24.19) | 1.12 (0.90 ~ 1.38) | 0.302 |  |
| Non-Hispanic White | 1972 (40.80) | 1.13 (1.08 ~ 1.19) | **<0.001** |  |
| Other | 816 (16.88) | 1.42 (1.06 ~ 1.92) | **0.020** |  |
| Education |  |  |  | 0.487 |
| Below high school | 1548 (32.03) | 1.09 (0.95 ~ 1.26) | 0.238 |  |
| High School or above | 3285 (67.97) | 1.14 (1.10 ~ 1.20) | **<0.001** |  |
| Marital |  |  |  | 0.158 |
| No | 1904 (39.40) | 1.16 (1.10 ~ 1.22) | **<0.001** |  |
| Yes | 2929 (60.60) | 1.11 (1.03 ~ 1.20) | **0.007** |  |
| Drinking |  |  |  | 0.896 |
| No | 2170 (44.90) | 1.16 (1.05 ~ 1.27) | **0.003** |  |
| Yes | 2663 (55.10) | 1.13 (1.08 ~ 1.19) | **<0.001** |  |
| Smoking Status |  |  |  | 0.195 |
| Current Smoker | 853 (17.65) | 1.12 (1.02 ~ 1.23) | **0.017** |  |
| Former Smoker | 1611 (33.33) | 1.12 (1.05 ~ 1.19) | **<0.001** |  |
| Never Smoker | 2369 (49.02) | 1.25 (1.14 ~ 1.37) | **<0.001** |  |
| Poverty |  |  |  | 0.001 |
| No | 3286 (67.99) | 1.12 (1.06 ~ 1.18) | **<0.001** |  |
| Yes | 1547 (32.01) | 1.36 (1.22 ~ 1.51) | **<0.001** |  |
| BMI |  |  |  | 0.002 |
| < 25 | 502 (10.39) | 1.35 (1.19 ~ 1.53) | **<0.001** |  |
| 25–30 | 1499 (31.02) | 1.09 (1.01 ~ 1.18) | **0.022** |  |
| ≥ 30 | 2832 (58.60) | 1.29 (1.16 ~ 1.44) | **<0.001** |  |

Abbreviation: BMI: Body Mass Index; NLR: Neutrophil-to-Lymphocyte Ratio; HR: Hazard ratios.


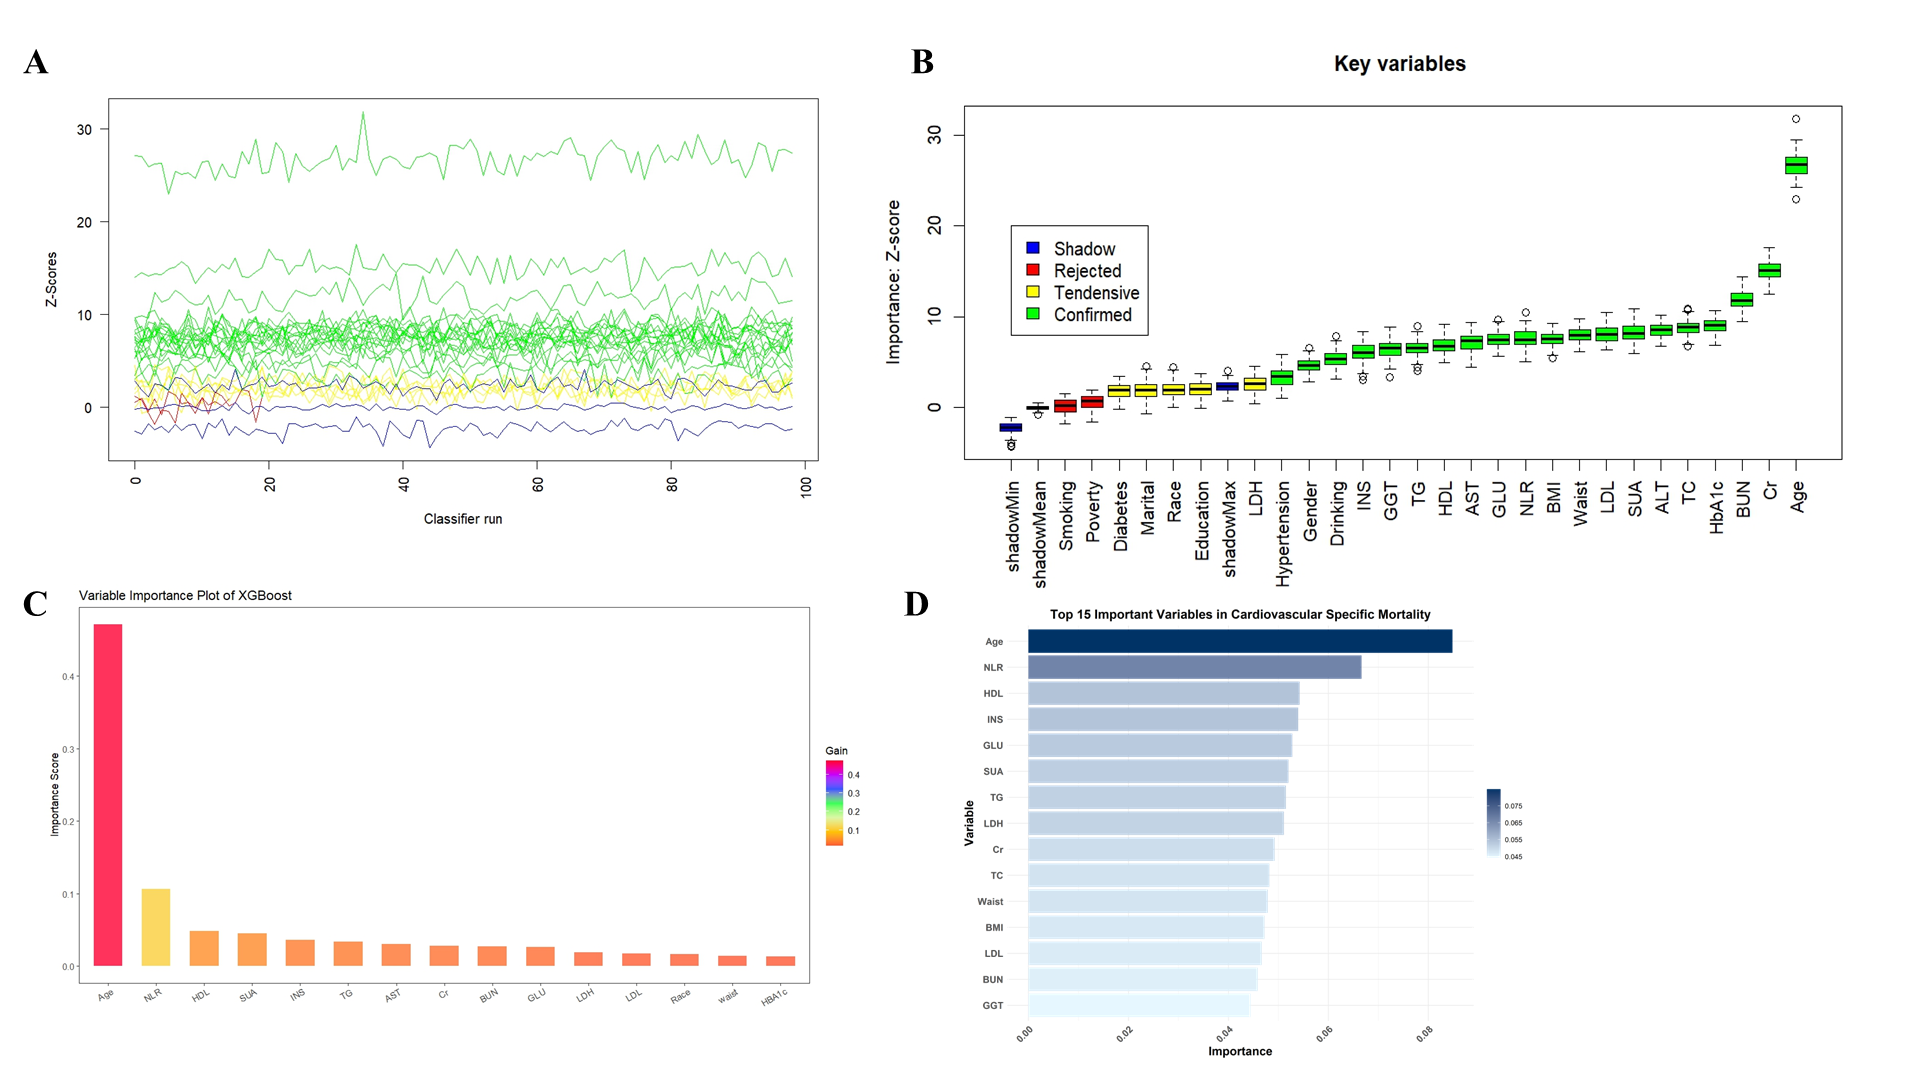


**Fig. S1** The critical covariates associated with cardiovascular specific mortality identified by three distinct machine learning methods. The critical covariates associated with cardiovascular specific mortality identified by three distinct machine learning methods. A. Schematic of the Boruta algorithm iteration process. B. Key features selected after 500 iterations based on minimum cost function: x-axis represents input variables; y-axis shows feature importance (Z-scores). Shadow features are denoted by blue boxplots (minimum/mean/maximum Z-scores), while confirmed, tentative, and rejected features are indicated by green, yellow, and red boxplots, respectively. C-D. Top 15 important features ranked by XGBoost (C) and SVM-RFE (D) algorithms. BMI: Body Mass Index; TC: Total Cholesterol; FBG: Fasting Blood Glucose; HbA1c: Glycated Hemoglobin; FINS: Fasting Insulin; HDL: High-Density Lipoprotein; LDL: Low-Density Lipoprotein; TG: Triglycerides; ALT: Alanine Aminotransferase; AST: Aspartate Aminotransferase; Cr: Creatinine; SUA: Serum Uric Acid; GGT: Gamma-Glutamyl Transferase; LDH: Lactate Dehydrogenase; NLR: Neutrophil-to-Lymphocyte Ratio; XGBoost: eXtreme Gradient Boosting; SVM-RFE: Support Vector Machine - Recursive Feature Elimination.

**
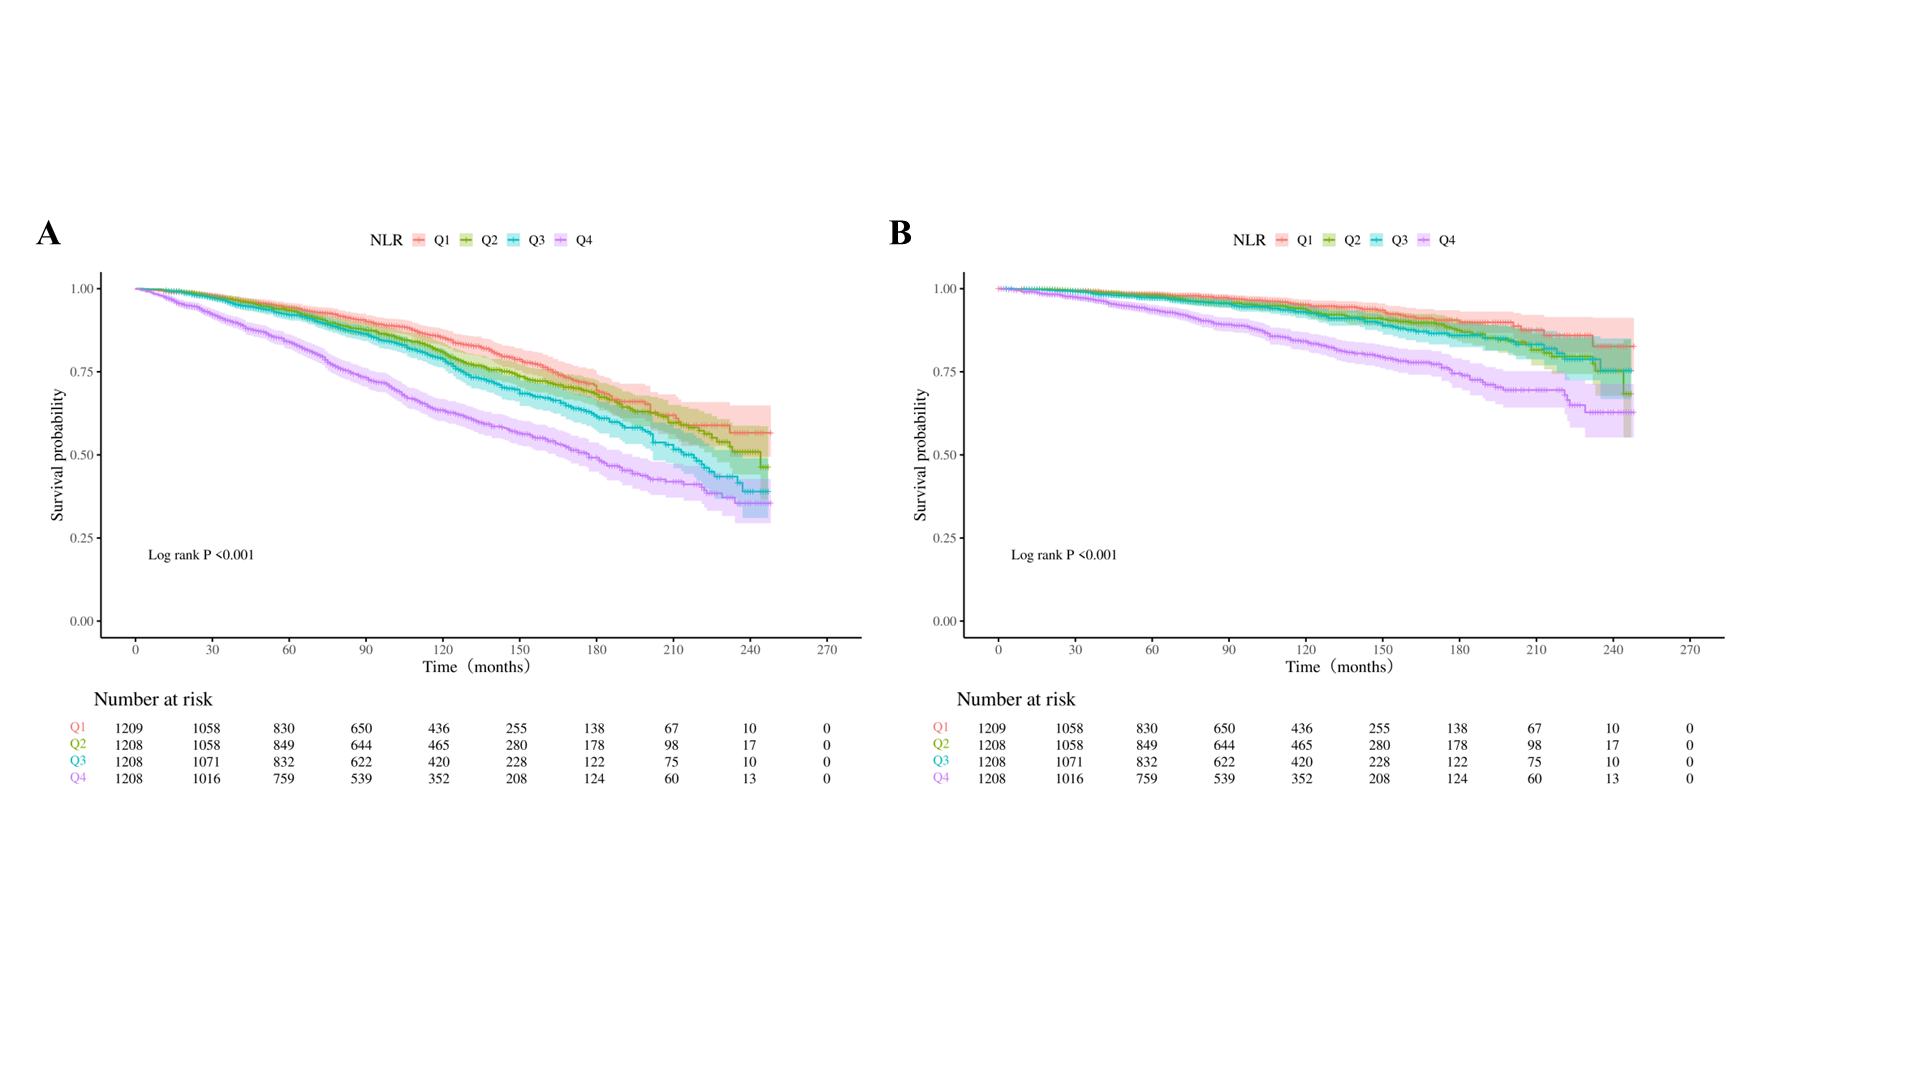
**

**Fig. S2** Kaplan-Meier analysis shows all‑cause (A) and cardiovascular specific mortality (B) across NLR quartiles. Abbreviation: NLR: Neutrophil-to-Lymphocyte Ratio.


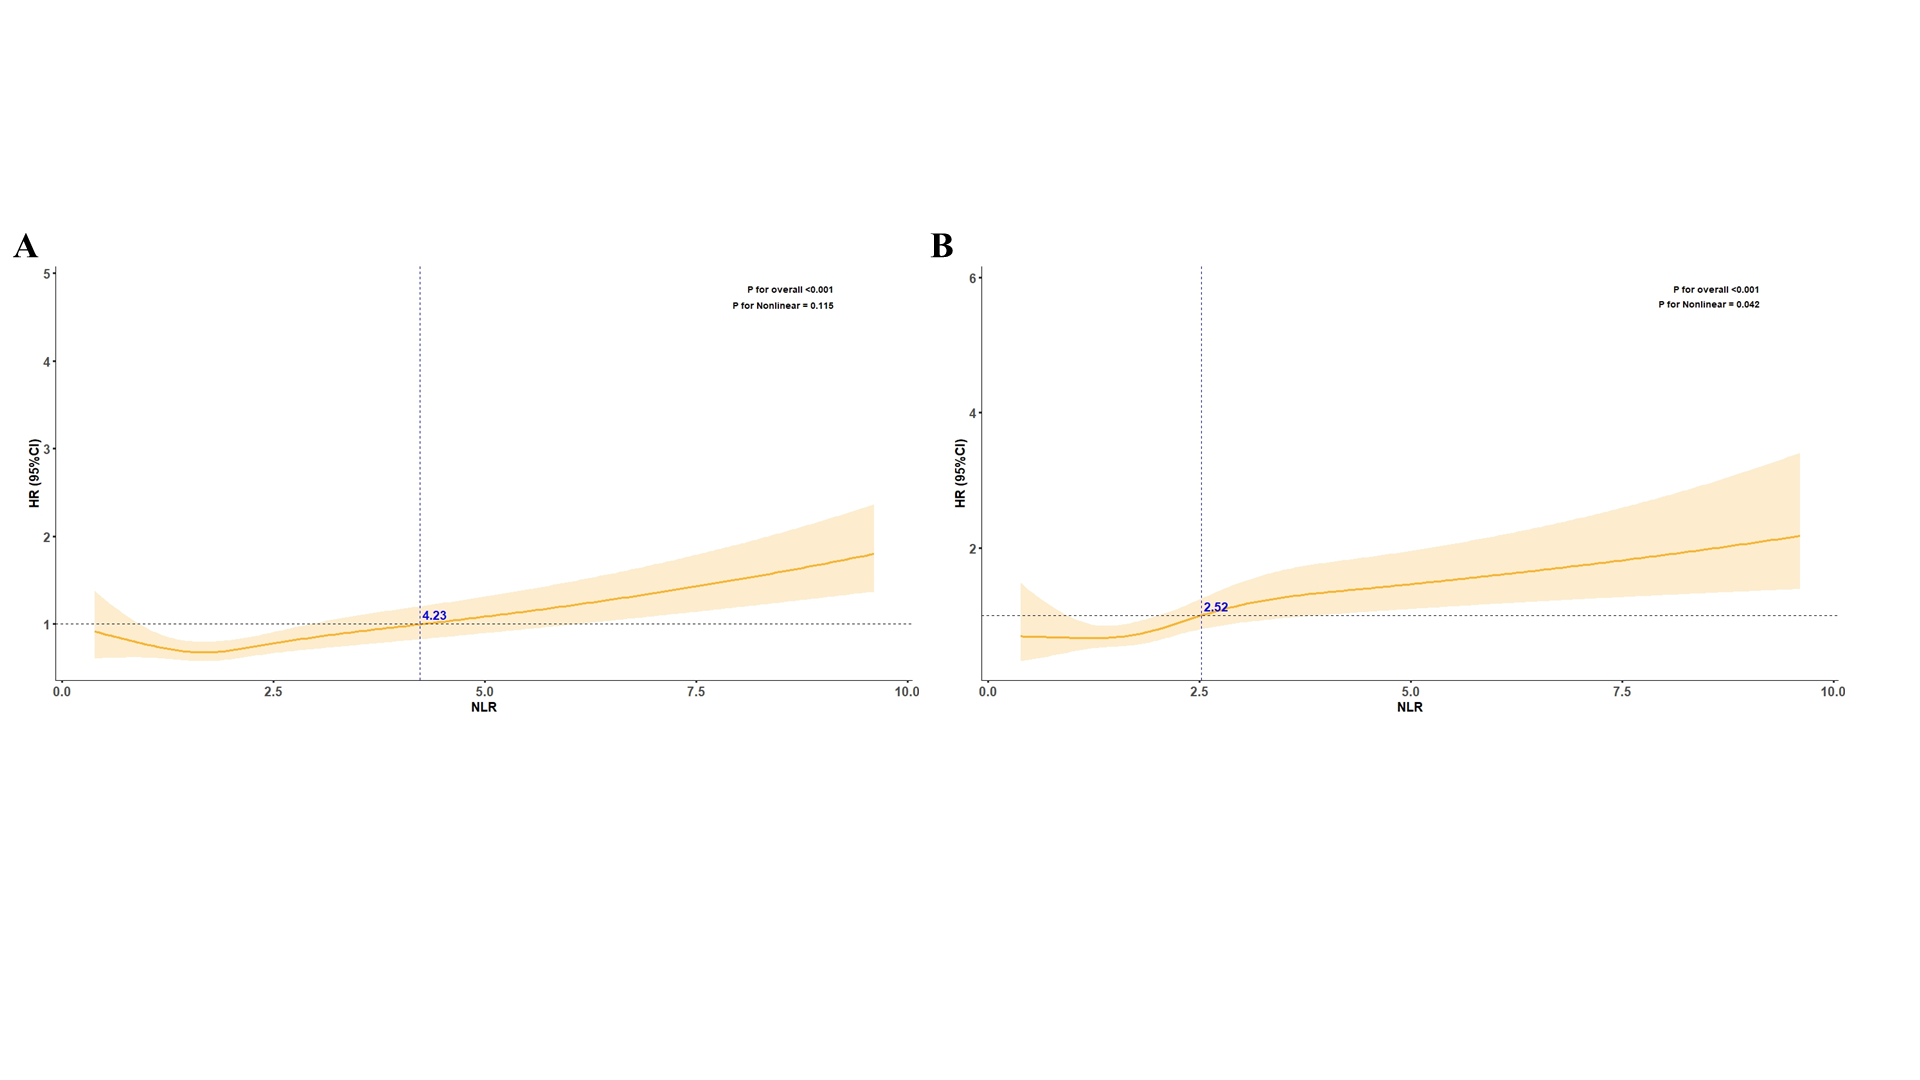


**Fig. S3** RCS analysis of the association between NLR levels and risks of all-cause mortality (A) and cardiovascular-specific mortality (B). Abbreviation: NLR: Neutrophil-to-Lymphocyte Ratio; HR: Hazard ratios; CI: Confidence Interval.


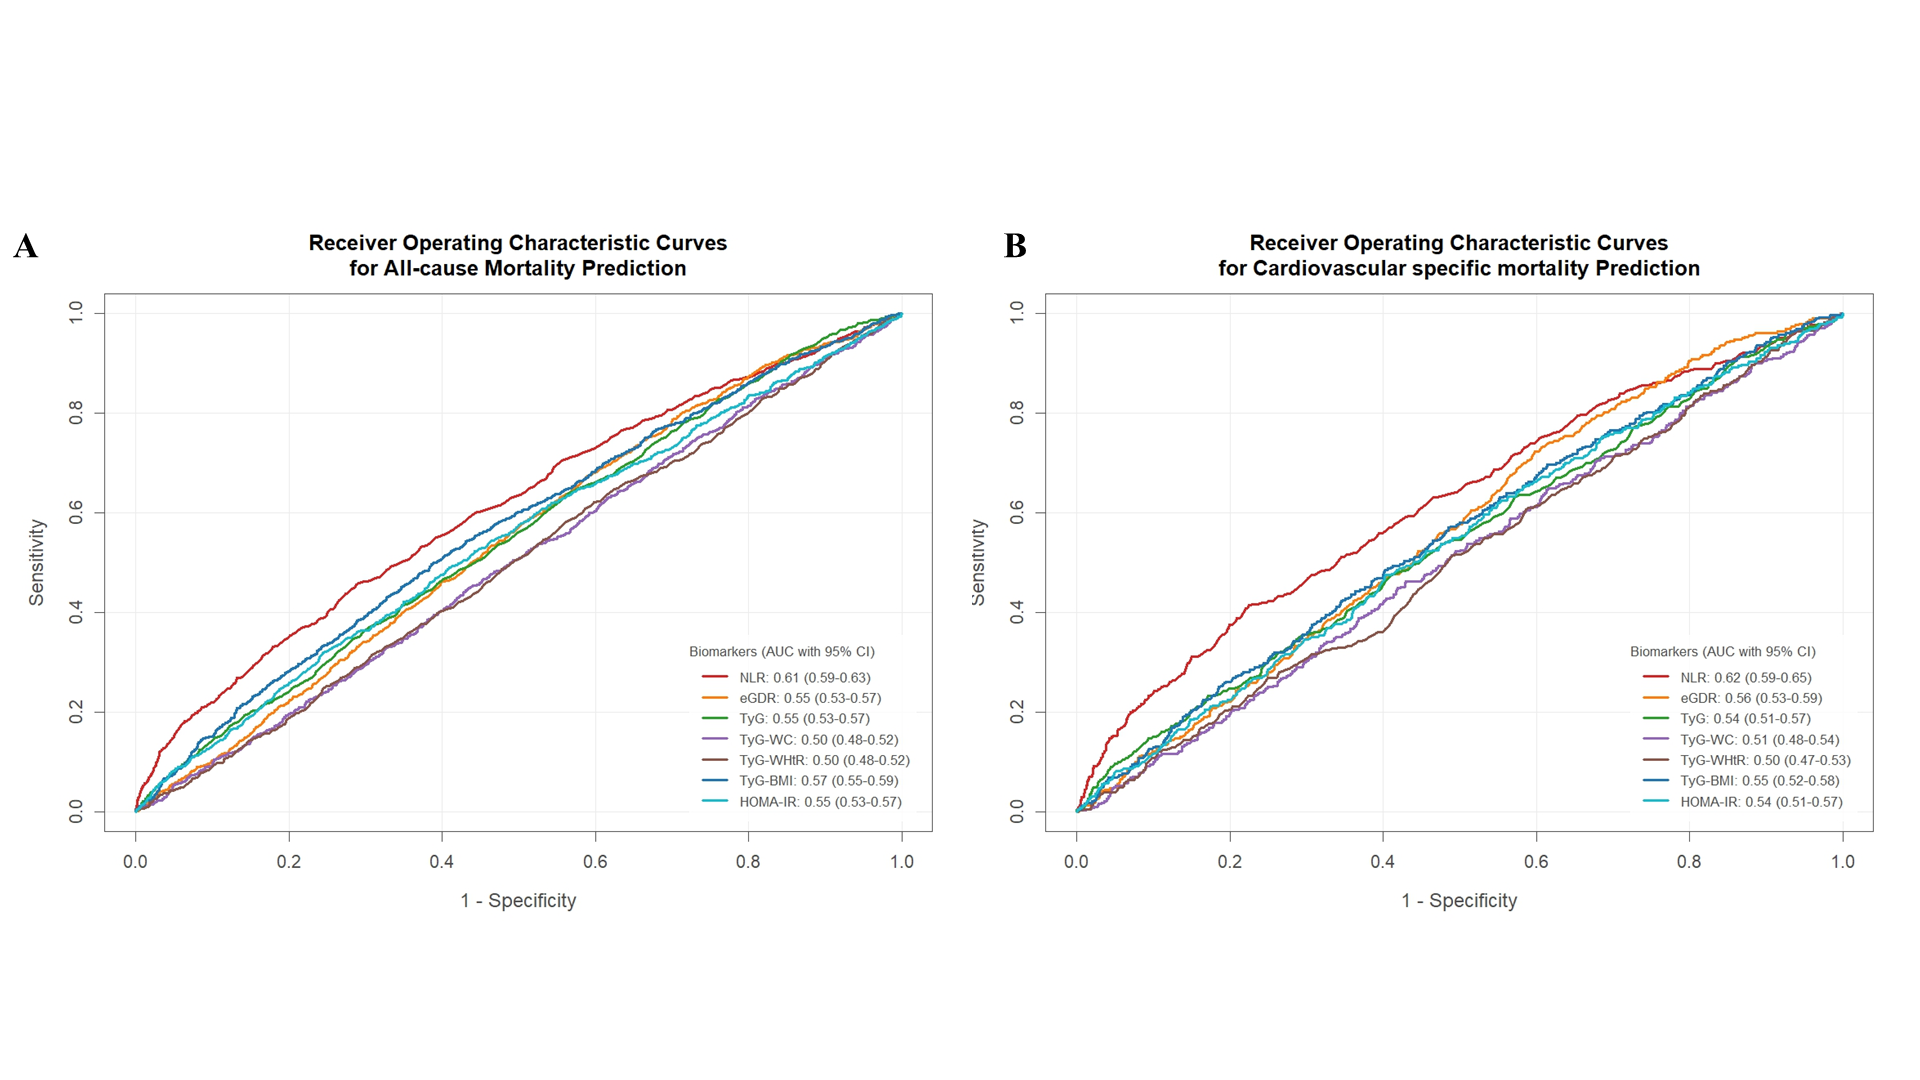


**Fig. S4** ROC curves of the NLR and IR indices for predicting all-cause (A) and cardiovascular-specific mortality (B). Abbreviation: AUC: Area under the curve; CI: Confidence Interval; NLR: Neutrophil-to-Lymphocyte Ratio; eGDR: Estimated Glucose Disposal Rate; TyG: Triglyceride-Glucose Index; TyG-BMI: Triglyceride-Glucose-Body Mass Index; TyG-WC: Triglyceride-Glucose-Waist Circumference; TyG-WHtR: Triglyceride-Glucose-Waist-to-Height Ratio; HOMA-IR: Homeostatic Model Assessment of Insulin Resistance.
